# Supplementary material
Source: publisher site journal article supplement (https://www.dovepress.com/article/433383)
Supplement: Supplementary file 1 [file get_supplementary_file.php]

**Table S1** ESRS and SPI-II scores for recurrent stroke

|                                     | ESRS               | SPI-II                                  |
|-------------------------------------|--------------------|-----------------------------------------|
| Inclusion                           | IS or TIA          | IS or TIA                               |
| Endpoint                            | IS within 1-3years | Recurrent stroke or death within 2years |
| Age                                 | 65-75=1, >75=2     | >70=2                                   |
| Arterial hypertension               | 1                  | 1                                       |
| Diabetes mellitus                   | 1                  | 3                                       |
| Smoking                             | 1                  | -                                       |
| Prior TIA or stroke                 | 1                  | -                                       |
| Prior Stroke                        |                    | 3                                       |
| Peripheral arterial disease         | 1                  | -                                       |
| Prior myocardial infarction         | 1                  | -                                       |
| Cardiovascular disease excluding MI | 1                  |                                         |
| Coronary heart disease              |                    | 1                                       |
| Cardiac failure                     |                    | 3                                       |
| Index event stroke vs.TIA           |                    | 2                                       |
| Risk stratification                 |                    |                                         |
| Low-risk group                      | 0-2                | 0-3                                     |
| Medium-risk group                   |                    | 4-7                                     |
| High-risk group                     | 3-9                | 8-15                                    |

ESRS, Essen Stroke Risk Score; SPI-II, Stroke Prognosis Instrument II; IS, Ischemic stroke; TIA, transitory ischemic attack; MI, myocardial infarction

**Table S2** Five-year cumulative rates for recurrent stroke and combined vascular events stratified by the ESRS

|                 | Recurrent Stroke |          |           | Combined vascular events |           |
|-----------------|------------------|----------|-----------|--------------------------|-----------|
|                 | n                | Rate (%) | 95% CI    | Rate (%)                 | 95% CI    |
| Low risk (0-2)  | 371              | 23.7     | 19.2-28.2 | 28.7                     | 24.0-33.4 |
| 0               | 28               | 3.7      | 0-10.8    | 10.7                     | 0.7-20.7  |
| 1               | 137              | 21.9     | 14.6-29.2 | 26                       | 18.6-33.4 |
| 2               | 206              | 27.9     | 27.2-34.4 | 33                       | 26.3-39.7 |
| High risk (3-8) | 437              | 33.2     | 28.3-38.1 | 41.6                     | 36.7-46.5 |
| 3               | 180              | 28.5     | 21.4-35.6 | 36.3                     | 29.0-43.6 |
| 4               | 134              | 32.6     | 24.2-41.0 | 39.3                     | 30.8-47.8 |
| 5               | 80               | 43.8     | 31.1-56.5 | 55.4                     | 43.8-67.0 |
| >5              | 43               | 38.7     | 21.8-55.6 | 47.3                     | 36.6-58.0 |
| Total           | 808              | 28.7     | 25.4-32.0 | 35.6                     | 32.3-38.9 |

ESRS, Essen Stroke Risk Score; CI, confidence interval.

**Table S3** Five-year cumulative rates for recurrent stroke and combined vascular events stratified by the SPI-II

|                   | n   | Recurrent Stroke |            | Combined vascular events |           |
|-------------------|-----|------------------|------------|--------------------------|-----------|
|                   |     | Rate (%)         | 95% CI     | Rate (%)                 | 95% CI    |
| Low risk (0-3)    | 438 | 23.3             | 19.2-27.4  | 28.8                     | 24.5-33.1 |
| 0                 | 172 | 15.4             | 9.9-19.9   | 19.8                     | 13.7-25.9 |
| 1                 | 71  | 23.9             | 13.3-34.5  | 31.6                     | 20.4-42.8 |
| 2                 | 76  | 33.1             | 21.7-44.5  | 36.9                     | 25.5-48.3 |
| 3                 | 119 | 28.9             | 20.3-35.5  | 35.4                     | 26.6-44.2 |
| Medium risk (4-7) | 225 | 31.9             | 25.2-38.2  | 39.6                     | 37.4-41.8 |
| 4                 | 27  | 26.1             | 8.1-34.1   | 35.5                     | 17.3-53.7 |
| 5                 | 81  | 26.6             | 16.6-36.6  | 29.5                     | 19.3-39.7 |
| 6                 | 58  | 45.5             | 31.7-59.3  | 55.2                     | 43.4-67.0 |
| 7                 | 59  | 28.5             | 15.6-41.4  | 39.6                     | 26.7-52.5 |
| High risk (8-15)  | 145 | 41.7             | 32.7-50.7  | 50.6                     | 42.0-59.2 |
| 8                 | 70  | 32.1             | 20.1-44.1  | 40.0                     | 28.0-52.0 |
| 9                 | 15  | 56.3             | 30.6-82.0  | 68.0                     | 43.7-92.3 |
| 10                | 27  | 54.8             | 31.1-78.5  | 64.5                     | 44.5-84.5 |
| >10               | 33  | 46.7             | 26.9-66.5  | 54.3                     | 27.3-81.3 |
| Total             | 808 | 28.7             | 25.40-32.0 | 35.6                     | 32.3-38.9 |

SPI-II, Stroke Prognosis Instrument II; CI, confidence interval.
